# Supplementary material for: 10 Be systematics in the Tsangpo-Brahmaputra catchment: the cosmogenic nuclide legacy of the eastern Himalayan syntaxis
Source: Copernicus journal article supplement (doi:10.5194/esurf-5-429-2017), 2017-08-10
Supplement: Supplementary file 1 [file esurf-5-429-2017-supplement.zip]

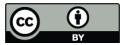

## *Supplement of*

# **$^{10}\text{Be}$ systematics in the Tsangpo-Brahmaputra catchment: the cosmogenic nuclide legacy of the eastern Himalayan syntaxis**

**Maarten Lupker et al.**

*Correspondence to:* Maarten Lupker ([maarten.lupker@erdw.ethz.ch](mailto:maarten.lupker@erdw.ethz.ch))

- [esurf-5-429-2017-supplement-title-page.pdf](#)
- [Cosmo\\_Tsangpo\\_STables.xlsx](#)

The copyright of individual parts of the supplement might differ from the CC BY 3.0 License.
